# Supplementary material for: Energy and Micronutrient Intake After Sleeve Gastrectomy and Roux-en-y Gastric Bypass – 1 Year Results From a Randomized Trial
Source: Research Square preprint supplement (doi:10.21203/rs.3.rs-8220503/v1), 2025-12-11
Supplement: Supplementary file 1 [file d896123a40d218d67cfb48de.docx]

Supplementary material

Energy and micronutrient intake after Sleeve Gastrectomy and Roux-en-y Gastric Bypass – 1 year result from a randomized trial

| Dietary intake assessed by 4-day food record | Overall  (n=285) | Under reporters (n=171) | Acceptable reporters (n=114) | p-values  (under reporters vs. acceptable reporters) |
| --- | --- | --- | --- | --- |
| Vitamin B1, Thiamnine (mg) | 0.9±0.4 | 0.8±0.3 | 1.1±0.5 | <0.001 |
| Vitamin B2, Riboflavin (mg) | 1.1±0.5 | 0.9±0.3 | 1.4±0.5 | <0.001 |
| Vitamin B3, Niacin (mg) | 14±7 | 12±5 | 17±8 | <0.001 |
| Vitamin B6, Pyridoxine (mg) | 1.3±0.9 | 1.1±0.5 | 1.7±1.3 | <0.001 |
| Vitamin E (µg) | 9±4 | 8±3 | 11±4 | <0.001 |
| Vitamin K (µg) | 50±34 | 44±29 | 59±38 | <0.001 |
| Potassium (mg) | 1820±600 | 1560±410 | 2200±630 | <0.001 |
| Selenium (µg) | 35±3 | 32±13 | 41±18 | <0.001 |
| Sodium (mg) | 2100±670 | 1830±540 | 2500±650 | <0.001 |
| Zinc (mg) | 7±3 | 7±2 | 10±3 | <0.001 |

**Supplementary table 2. Reported daily intake of energy and micronutrients from diet one year after surgery in under-reporters and acceptable reporters**

Results are given as mean ± SD

**Supplementary table 3. Reported intake of energy and micronutrients from diet one year after bariatric surgery compared with Swedish dietary habits (under-reporters excluded)**

|  | **Swedish dietary habits**  comparison group **(n=1430)** | | **Sleeve Gastrectomy**  **(n= 50)** | | **Roux-en-Y Gastric Bypass (n=64)** | |
| --- | --- | --- | --- | --- | --- | --- |
|  | Women (n=807) | Men (n=623) | Women (n=42) | Men  (n=8) | Women (n=52) | Men  (n=12) |
| Vitamin B1(mg) | 1±0.3 | 1±0.5 | 1±0.4 | 1±0.7 | 1±0.4 | 2±0.6 |
| Vitamin B2(mg) | missing | missing | 1±0.5 | 2±0.6 | 1±0.5 | 2±0.5 |
| Vitamin B3(mg) | 18±6 | 24±9 | 16±8 | 20±13 | 16±7 | 20±9 |
| Vitamin B6(mg) | missing | missing | 2±1 | 2±1 | 2±1 | 2±1 |
| Vitamin E (mg) | 11±8 | 12±6 | 11±4 | 16±5 | 11±4 | 12±3 |
| Vitamin K (µg) | missing | missing | 48±20 | 78±40 | 63±50 | 70±40 |
| Potassium (mg) | missing | missing | 2020±650 | 2720±600 | 2170±540 | 2650±580 |
| Selenium (µg) | 40±16 | 48±24 | 40±19 | 55±25 | 38±16 | 48±16 |
| Sodium (mg) | missing | missing | 2360±540 | 3160±560 | 2420±680 | 2900±580 |
| Zinc (mg) | missing | missing | 9±2 | 13±4 | 9±3 | 13±4 |

Results are given as mean ± SD

**Supplementary table 4. Reported intake of micronutrients from diet and supplements one year after surgery. Under-reporters excluded.**

|  | **Sleeve Gastrectomy (n= 50)** | | | **Roux-en-Y Gastric Bypass (n=64)** | | | |
| --- | --- | --- | --- | --- | --- | --- | --- |
|  |
|  | Diet | Supplements |  | Diet | Supplements |  |
|  |  |  |  |  |  |  |
| Vitamin B1 (mg) | 1±0 | 1±1 |  | 1±0 | 1±0 |  |
| Vitamin B2 (mg) | 1±1 | 1±1 |  | 1±0 | 1±0 |  |
| Vitamin B3 (mg) | 16±9 | 15±5 |  | 17±7 | 16±2 |  |
| Vitamin B6 (mg) | 2±2 | 1±0 |  | 2±1 | 1±0 |  |
| Vitamin E (µg) | 12±4 | 12±6 |  | 11±4 | 12±5 |  |
| Vitamin K (µg) | 54±26 | 39±38 |  | 65±45 | 56±33 |  |
| Potassium (mg) | 2130±690 | missing |  | 2260±580 | missing |  |
| Selenium (µg) | 43±20 | 55±21 |  | 40±16 | 59±15 |  |
| Sodium (mg) | 2480±610 | missing |  | 2520±680 | missing |  |
| Zinc (mg) | 10±3 | 12±13 |  | 9±3 | 11±11 |  |

Results are given as mean ± SD

**Supplementary table 5. Reported intake of energy and micronutrients from diet, supplements and total intake one year after surgery. Under-reporters excluded.**

|  | **Sleeve Gastrectomy (n= 50)** | | | **Roux-en-Y Gastric Bypass (n=64)** | | | **Difference between**  **Sleeve Gastrectomy and**  **Roux-en-Y Gastric Bypass** | | |
| --- | --- | --- | --- | --- | --- | --- | --- | --- | --- |
|  | **Diet** | **Supplements** | **Total** | **Diet** | **Supplements** | **Total** | **p-value**  **Diet** | **p-value**  **Supplements** | **p-value**  **Total** | |
| Vitamin B1 (mg) | 1±0 | 1±1 | 2±1 | 1±0 | 1±0 | 2±1 | 1.0 | 0.26 | 0.50 | |
| Vitamin B2 (mg) | 1±1 | 1±0 | 3±1 | 1±0 | 1±0 | 3±1 | 0.63 | 0.11 | 0.58 | |
| Vitamin B3 (mg) | 16±9 | 15±5 | 32±11 | 17±7 | 16±2 | 33±9 | 0.68 | 0.23 | 0.32 | |
| Vitamin B6 (mg) | 2±2 | 1±0 | 3±2 | 2±1 | 1±0 | 3±1 | 0.72 | 0.12 | 0.92 | |
| Vitamin E (µg) | 12±4 | 12±6 | 24±8 | 11±4 | 12±5 | 23±6 | 0.14 | 0.70 | 0.20 | |
| Vitamin K (µg) | 53±26 | 39±38 | 92±46 | 65±45 | 56±33 | 121±54 | 0.11 | 0.003 | 0.001 | |
| Potassium (mg) | 2130±690 | missing | - | 2260±580 | missing | - | 0.29 | - | - | |
| Selenium (µg) | 43±20 | 55±21 | 98±33 | 40±16 | 59±15 | 98±23 | 0.40 | 0.33 | 0.99 | |
| Sodium (mg) | 2480±610 | missing | - | 2520±680 | missing | - | 0.78 | - | - | |
| Zinc (mg) | 10±3 | 12±13 | 20±7 | 9±3 | 11±11 | 20±7 | 0.92 | 0.69 | 0.97 | |

Results are given as mean ± SD
